# Supplementary material
Source: PubMed Central journal article supplement (PMC4376558)

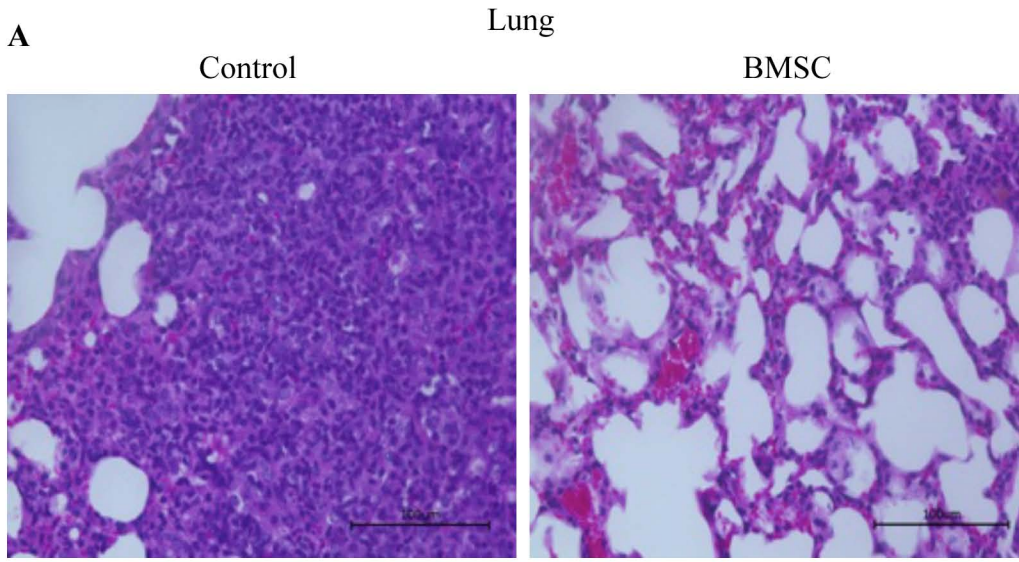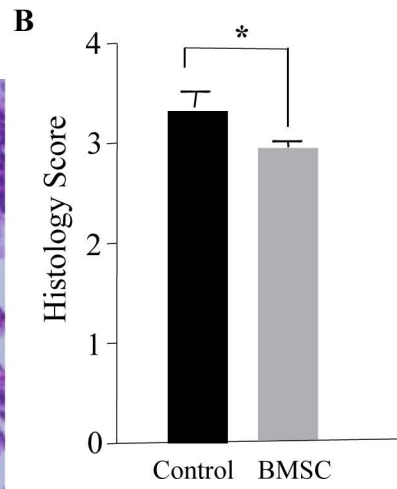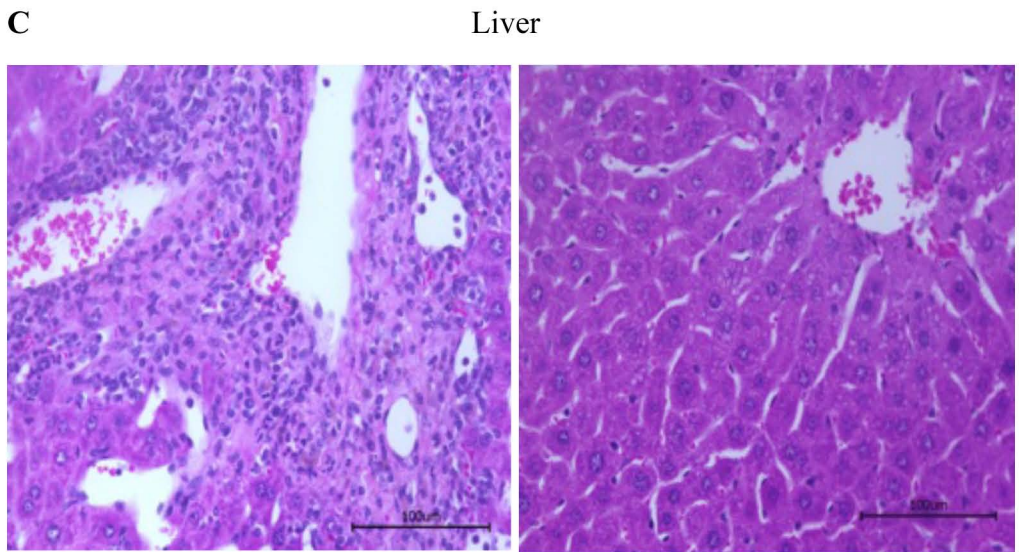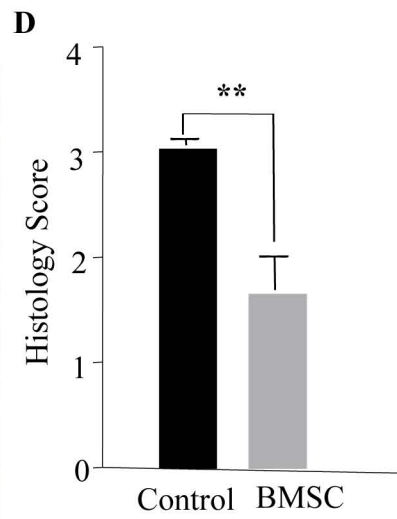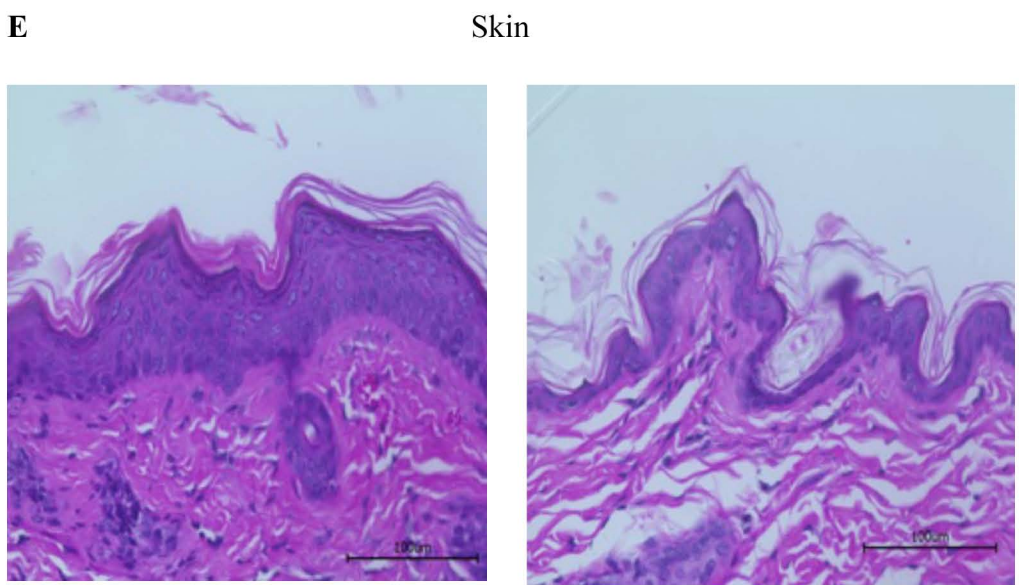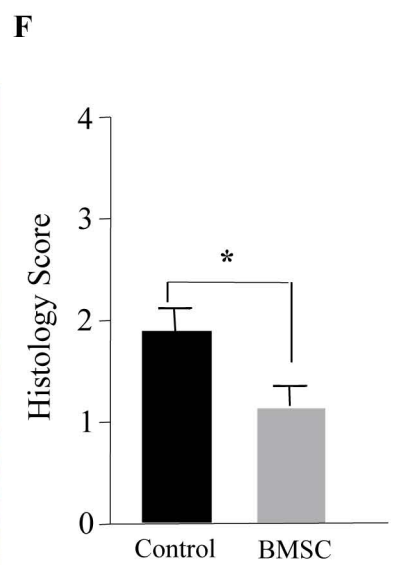

Supplemental Figure 1

# BM

**A**

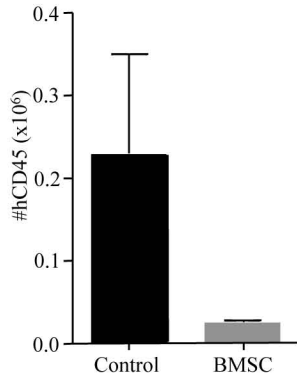

**B**

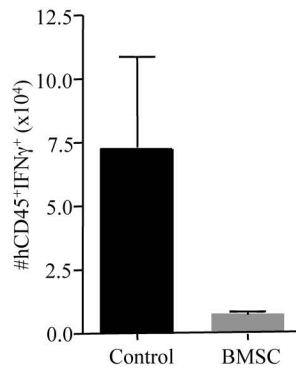

**C**

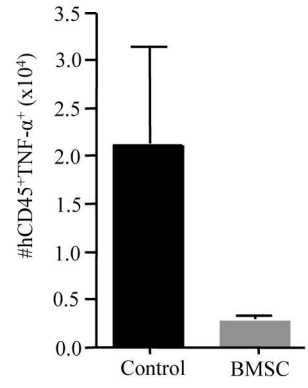

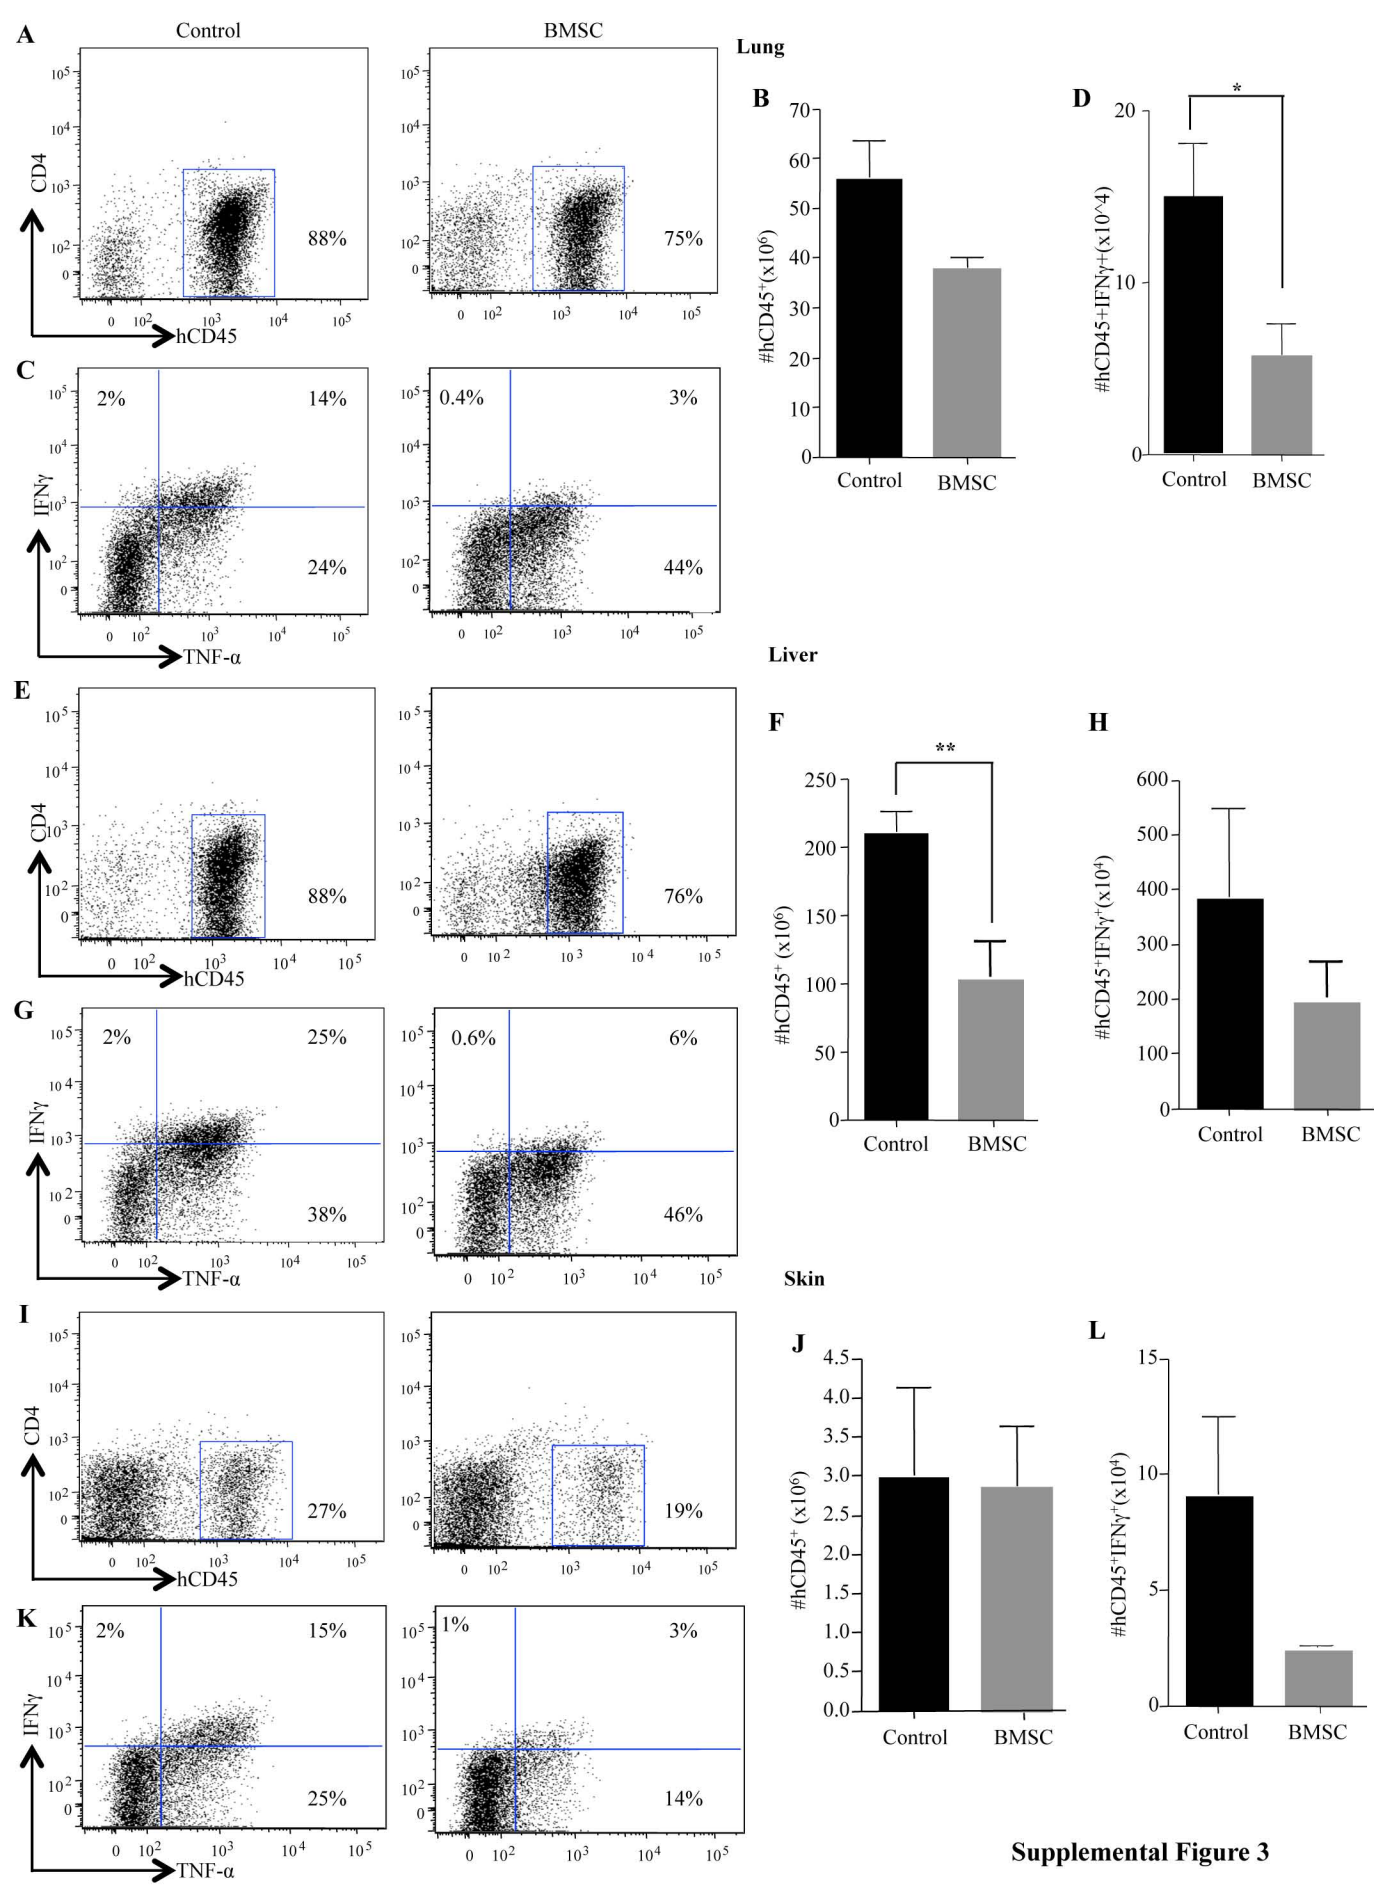

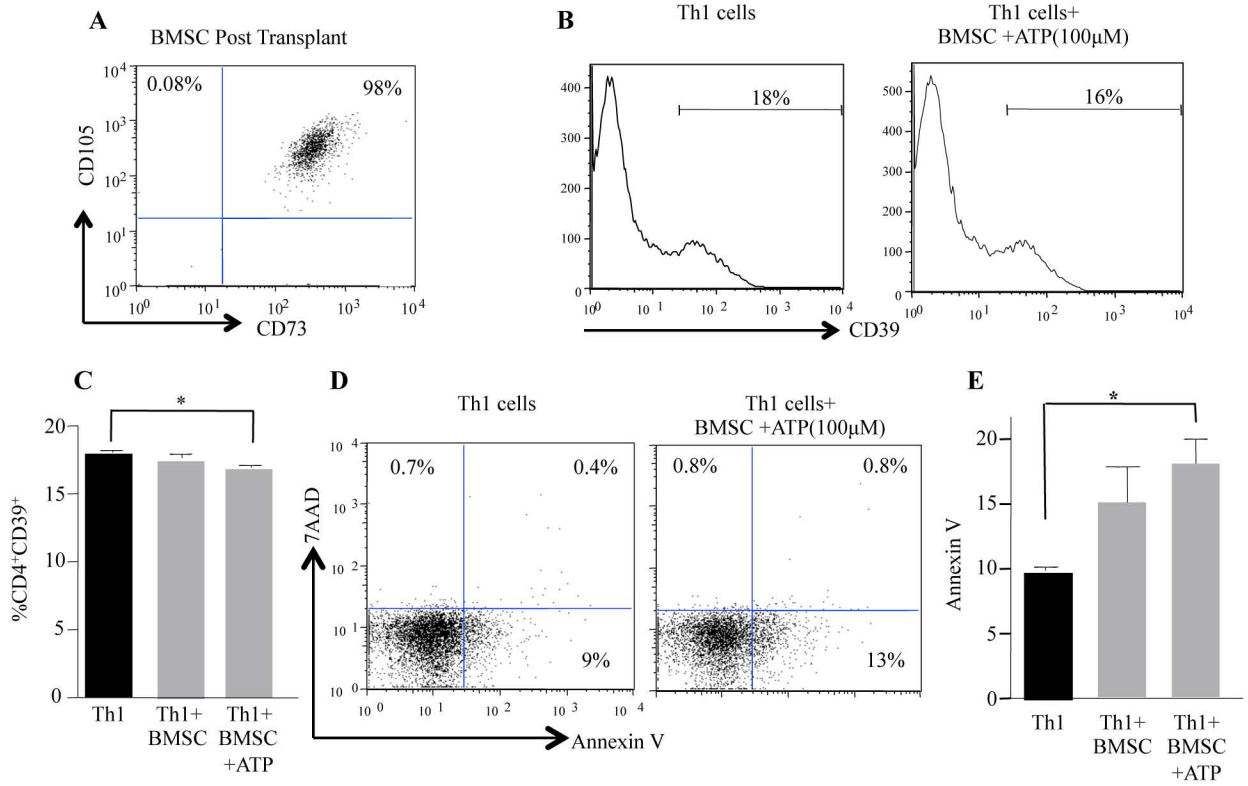

**F**

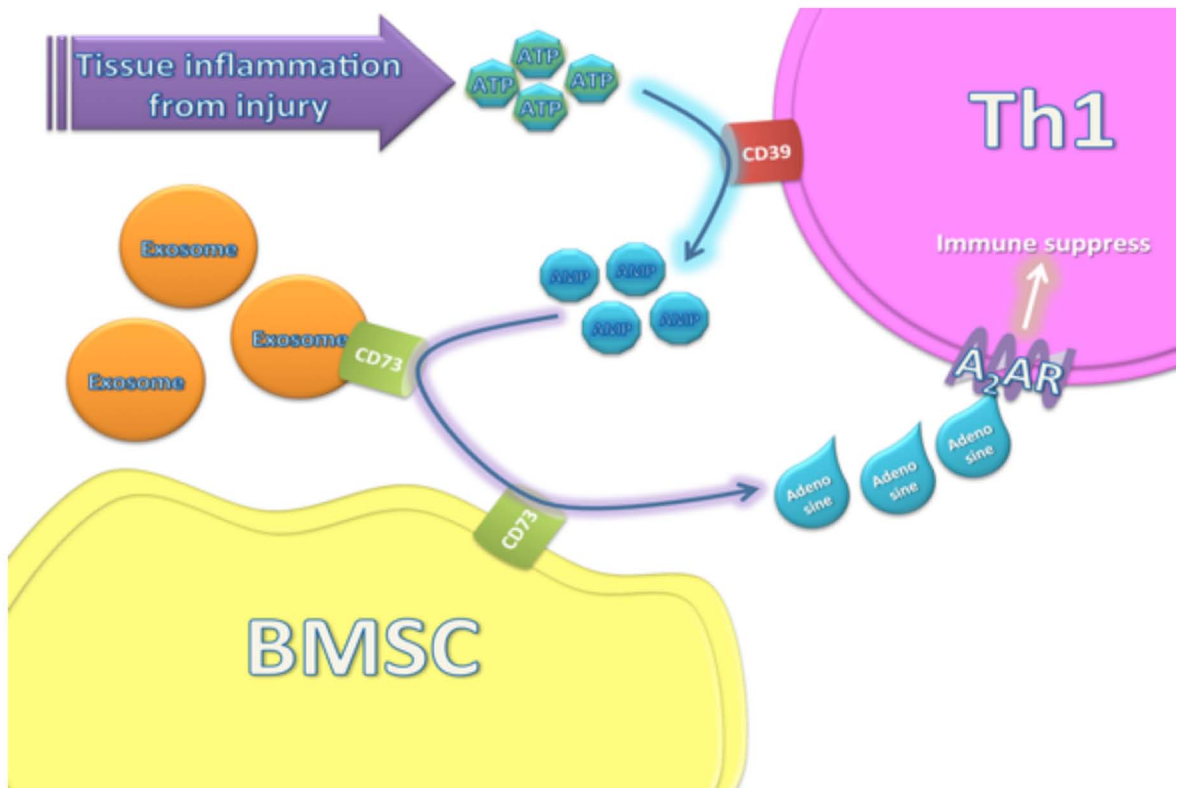

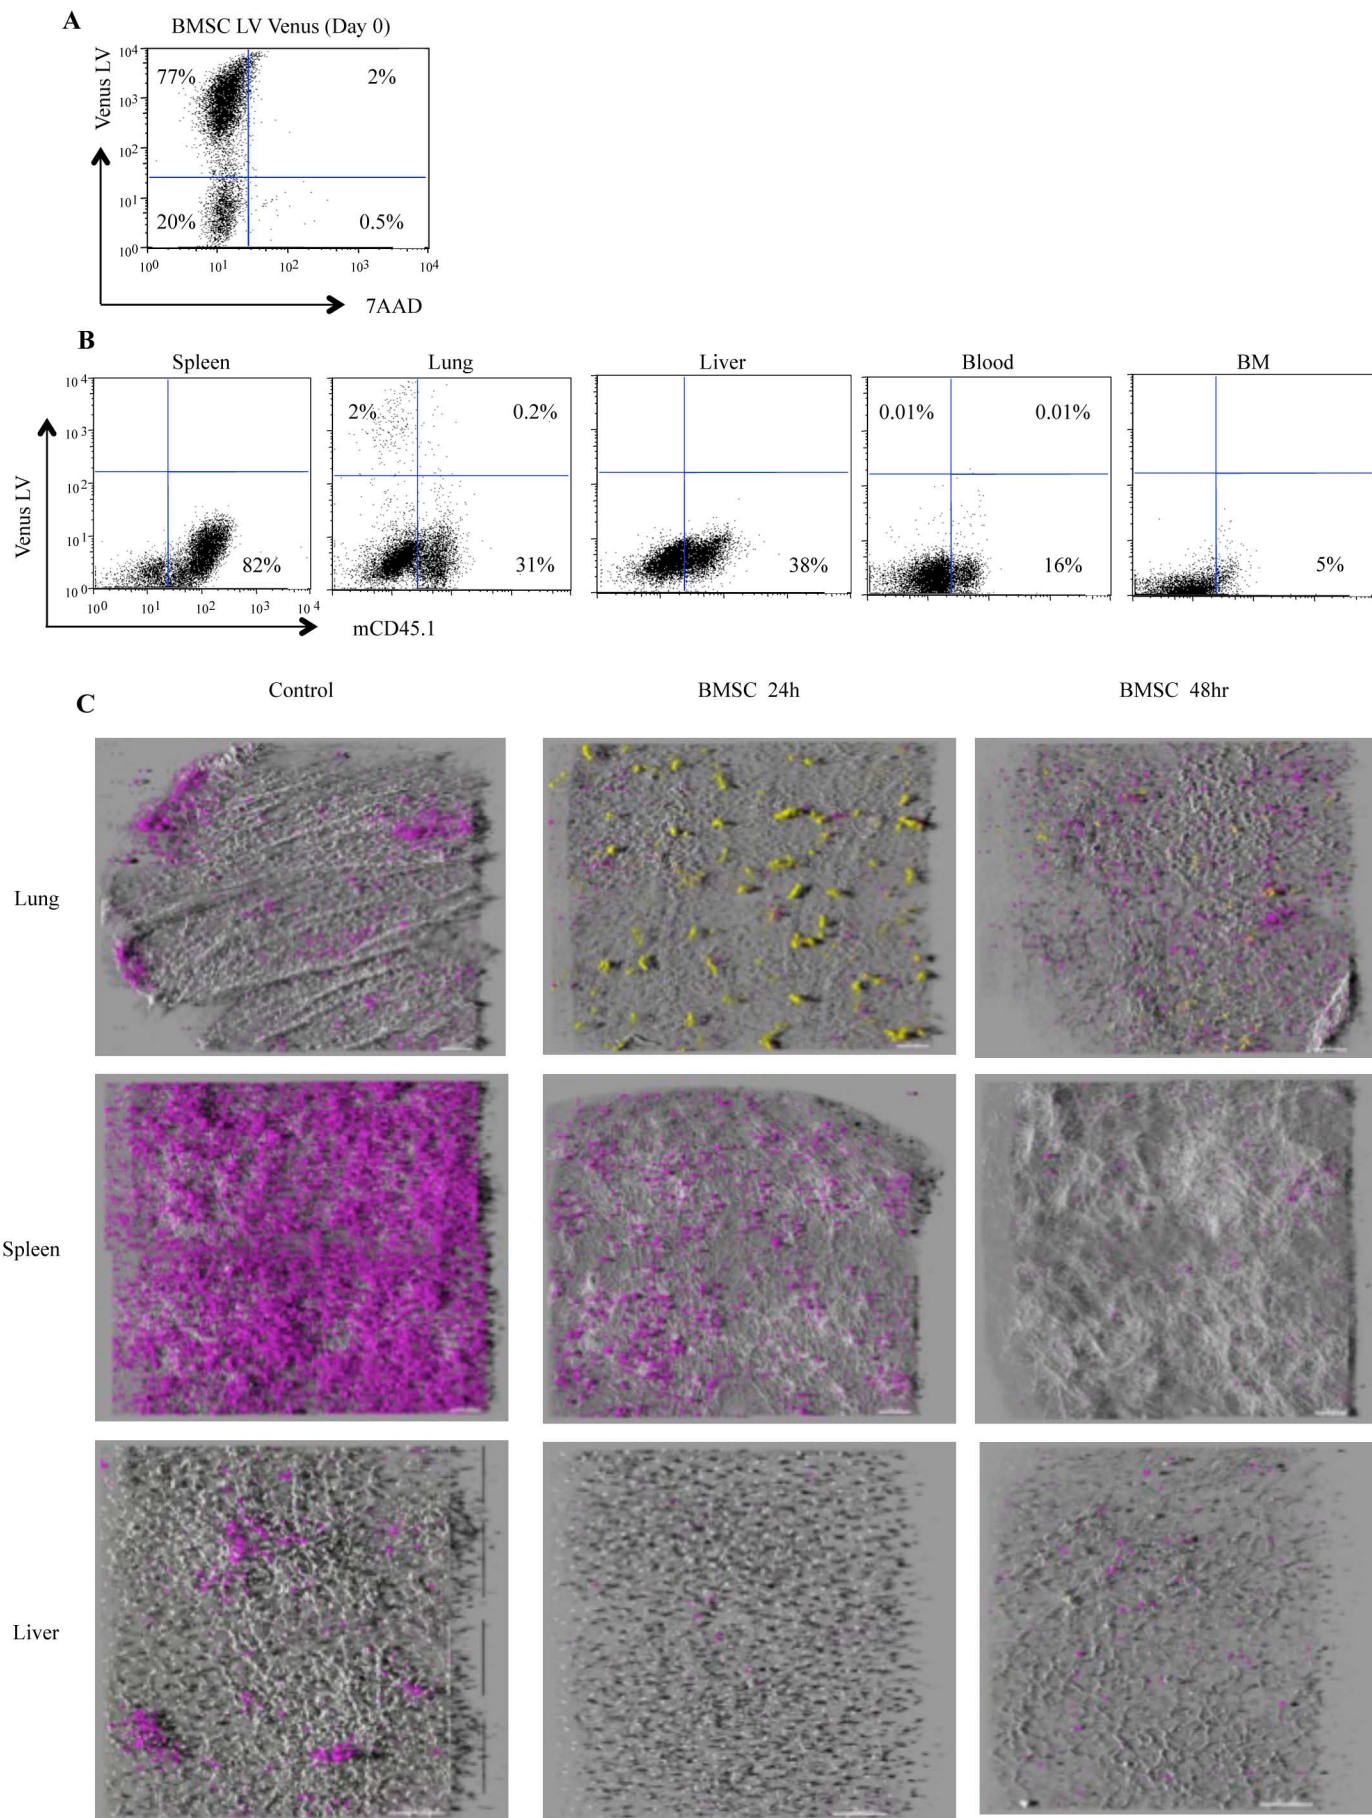

Supplemental Figure 5

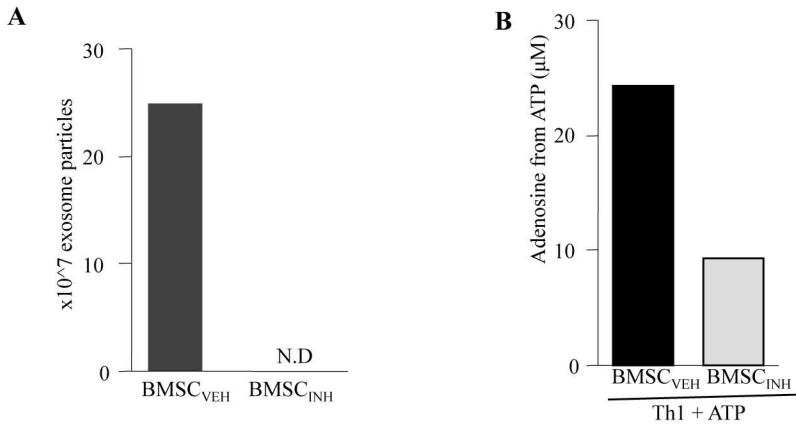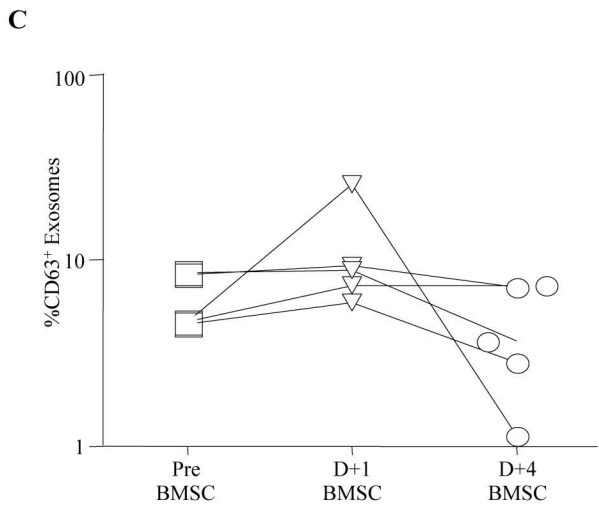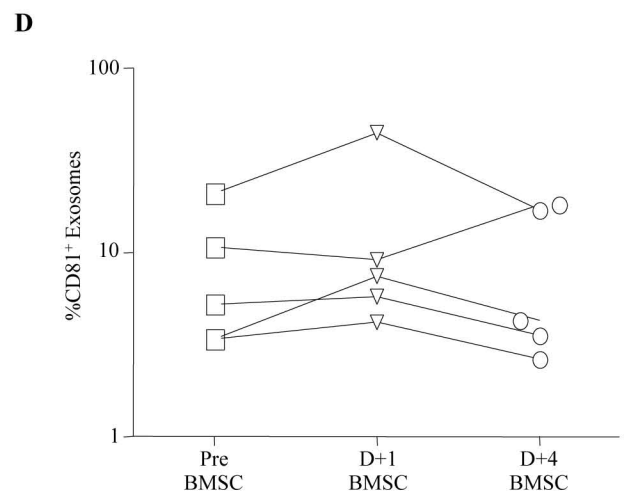

Supplement: NIHMS650309-supplement-Supp_FigureS1-S6.pdf [file NIHMS650309-supplement-Supp_FigureS1-S6.pdf]
